# Supplementary material for: Prognostic Value of High-Sensitivity Modified Glasgow Prognostic Score in Castration-Resistant Prostate Cancer Patients Who Received Docetaxel
Source: PubMed Central journal article supplement (PMC7918602; doi:10.3390/cancers13040773), 2021-02-12
Supplement: cancers-13-00773-s001.pdf [file cancers-13-00773-s001.pdf]

**Supplementary Material:**

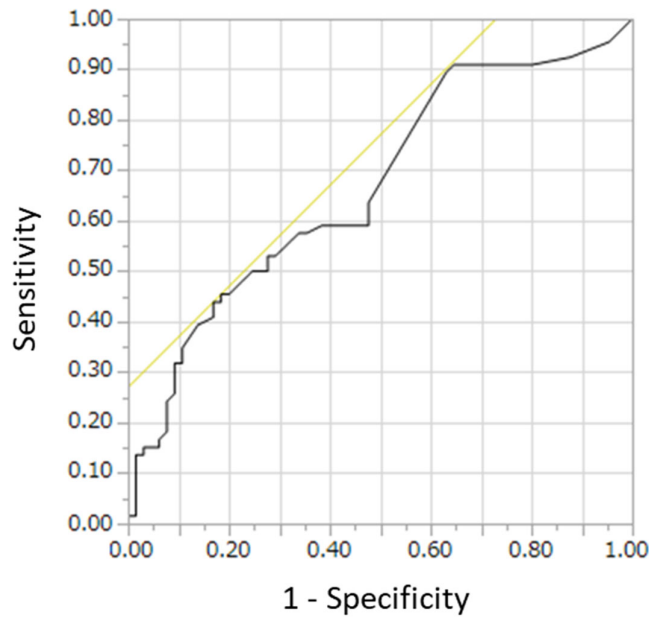

**Figure S1.** Receiver operating characteristic (ROC) curves for C-reactive protein (CRP) to predict death, regardless of the cause of death. Area under the curve (AUC) of CRP was 0.668 (P = 0.0522).

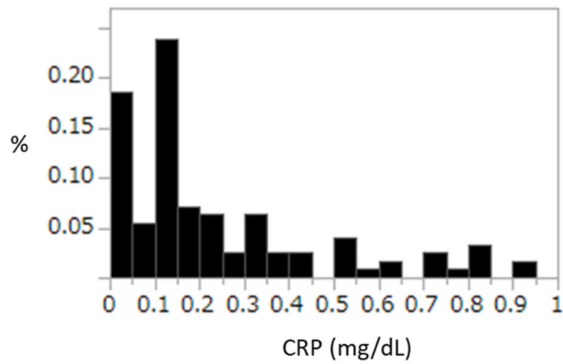

**Figure S2.** Distribution of CRP level at the start of docetaxel therapy.

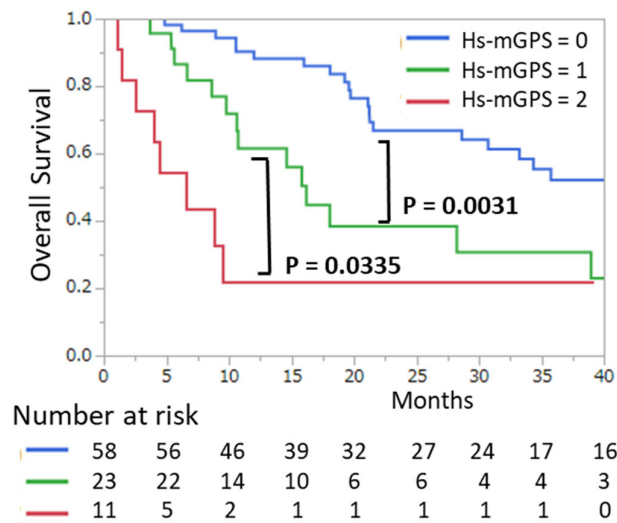

**Figure S3.** Kaplan-Meier curves for OS according to Hs-mGPS in patients who had received only best supportive care (BSC) after docetaxel. P-values were calculated by the log-rank test.

**Table S1.** Relationships of PSA and testosterone according to Hs-mGPS.

| Hs-mGPS                           | Median/Average |
|-----------------------------------|----------------|
| Prostate specific antigen (ng/mL) |                |
| 0                                 | 21.7 / 64.3    |
| 1                                 | 45.1 / 67.5    |
| 2                                 | 41.9 / 498.7   |
| Testosterone (ng/dL)              |                |
| 0                                 | 9.0 / 13.4     |
| 1                                 | 16.5 / 17.1    |
| 2                                 | 23.0 / 21.5    |

PSA, prostate specific antigen; TST, testosterone; Hs-mGPS, high-sensitivity modified Glasgow prognostic score

**Table S2.** Two-group analysis with and without ARAT (abiraterone or enzalutamide) treatment before docetaxel.

|                 | ARAT (+)<br>N = 22 | ARAT (-)<br>N = 72 | P value             |
|-----------------|--------------------|--------------------|---------------------|
| Combined score* |                    |                    |                     |
| 2-4             | 14 (63.6%)         | 37 (51.4%)         | 0.3099 <sup>¶</sup> |
| 0-1             | 8 (36.4%)          | 35 (48.6%)         |                     |
| PSA response    |                    |                    |                     |
| ≥ 50% response  | 10 (45.5%)         | 36 (50.0%)         | 0.7088 <sup>¶</sup> |
| < 50% response  | 12 (54.5%)         | 36 (50.0%)         |                     |

PSA, prostate-specific antigen; ARAT, androgen receptor axis targeted therapy, <sup>¶</sup> chi-square test, \* The combined score was calculated with the high sensitivity modified Glasgow prognostic score (score 0-2), PSA score (score 0-1), and testosterone score (score 0-1). A patient with PSA > 28.9 mg/mL was scored as 1, and a patient with TST > 13.0 ng/dL was scored as 1.
